# Supplementary material for: Indoxyl sulfate reduces Ito,f by activating ROS/MAPK and NF-κB signaling pathways
Source: PubMed Central journal article supplement (PMC8855797; doi:10.1172/jci.insight.145475), 2022-02-08
Supplement: jciinsight-7-145475-s302.pdf [file jciinsight-7-145475-s302.pdf]

# Supplementary materials

## Supplementary Figure 1

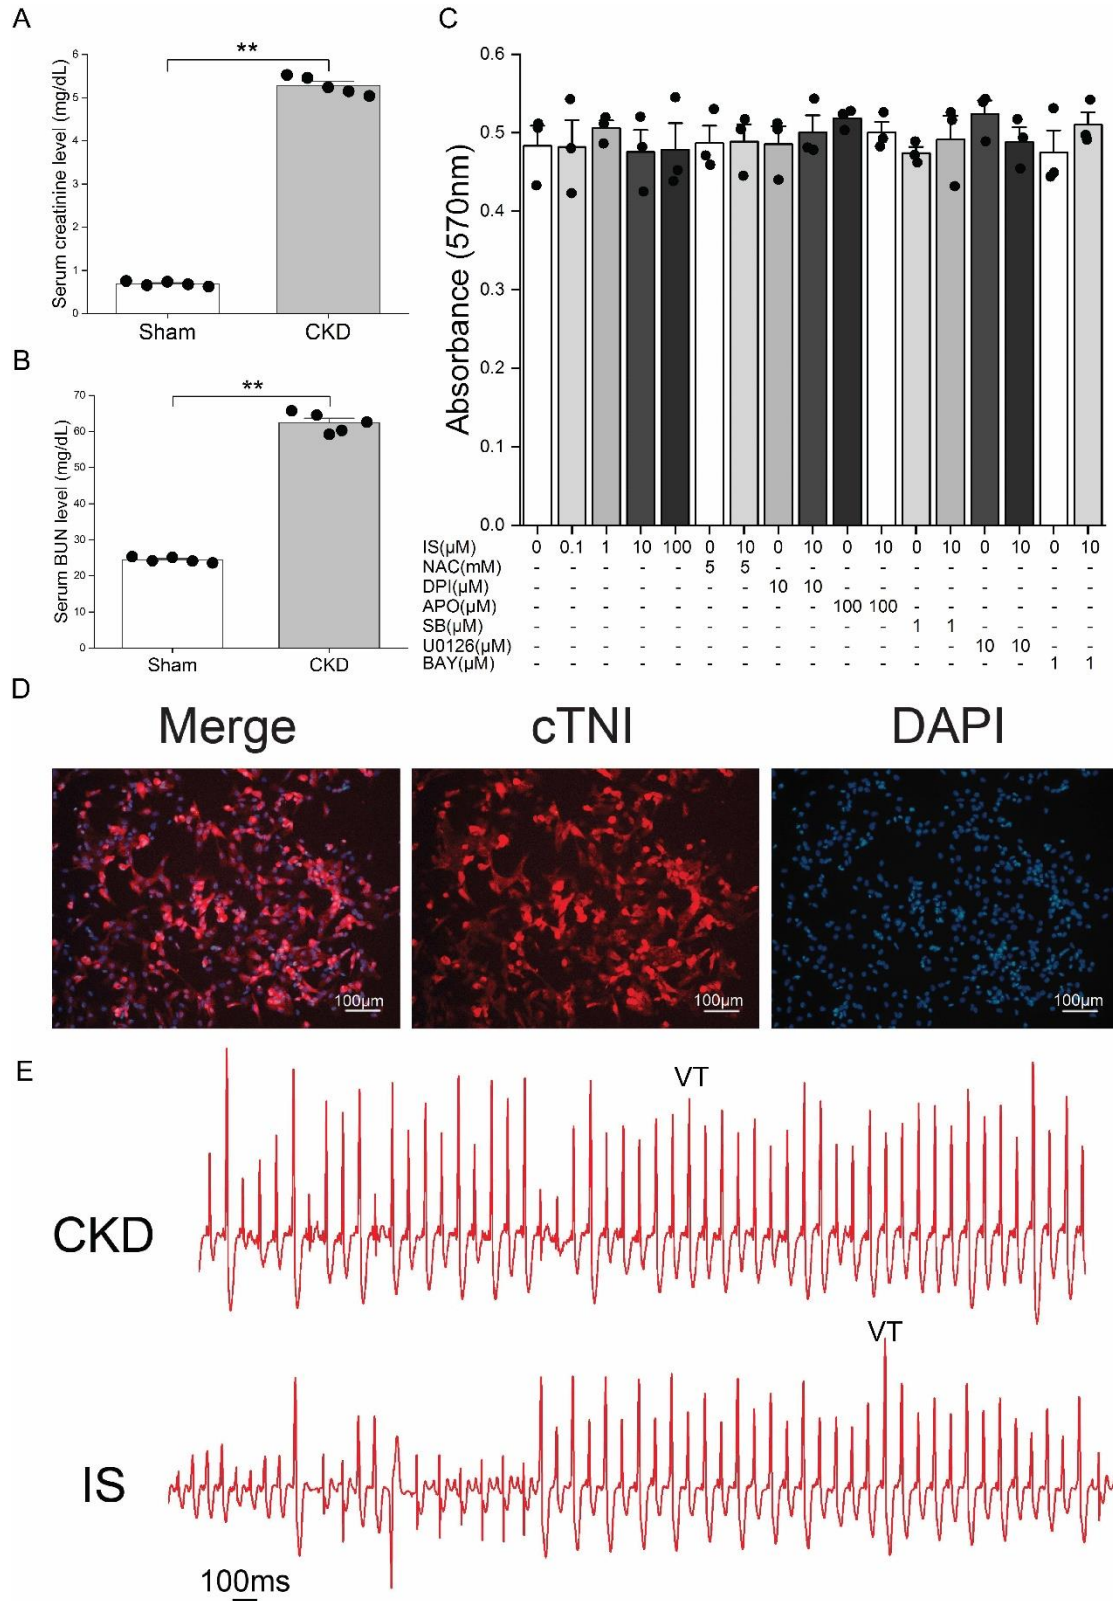

Supplementary Figure 1. Measurements of creatinine, BUN and cell viability, identification of cell purity and amplification

**of electrocardiogram strips. (A-B)** Measurements of serum creatinine (**A**) and BUN (**B**) levels in rats (n=5 per group). (**C**)Determination of cell viability based on 3-(4,5-Dimethyl-2-thiazolyl)-2,5-diphenyl-2H-tetrazolium bromide (MTT) assay in NRVMs (n=3 per group). (**D**) Representative fluorescence image of cardiac troponin I (cTNI) in NRVMs. Scale bar,100  $\mu$ m. (**E**) Enlarged electrocardiogram strips of the rats after the intraperitoneal injection of isoproterenol and caffeine in CKD (n=5) and IS treatment groups (n=6). IS, Indoxyl sulfate; NAC, N-acetylcysteine;DPI, Diphenyleiiodonium chloride;APO,Apocynin;SB, SB203580;U0126, U0126-EtOH;BAY, BAY11-7082;VT,ventricular tachycardia. Data are presented as mean  $\pm$  SEM. Statistical analysis was performed using two-tailed Student's t-test (**A** and **B**) and one-way ANOVA followed by Bonferroni post-hoc test (**C**). \*\*P<0.01.

## Supplementary Figure 2

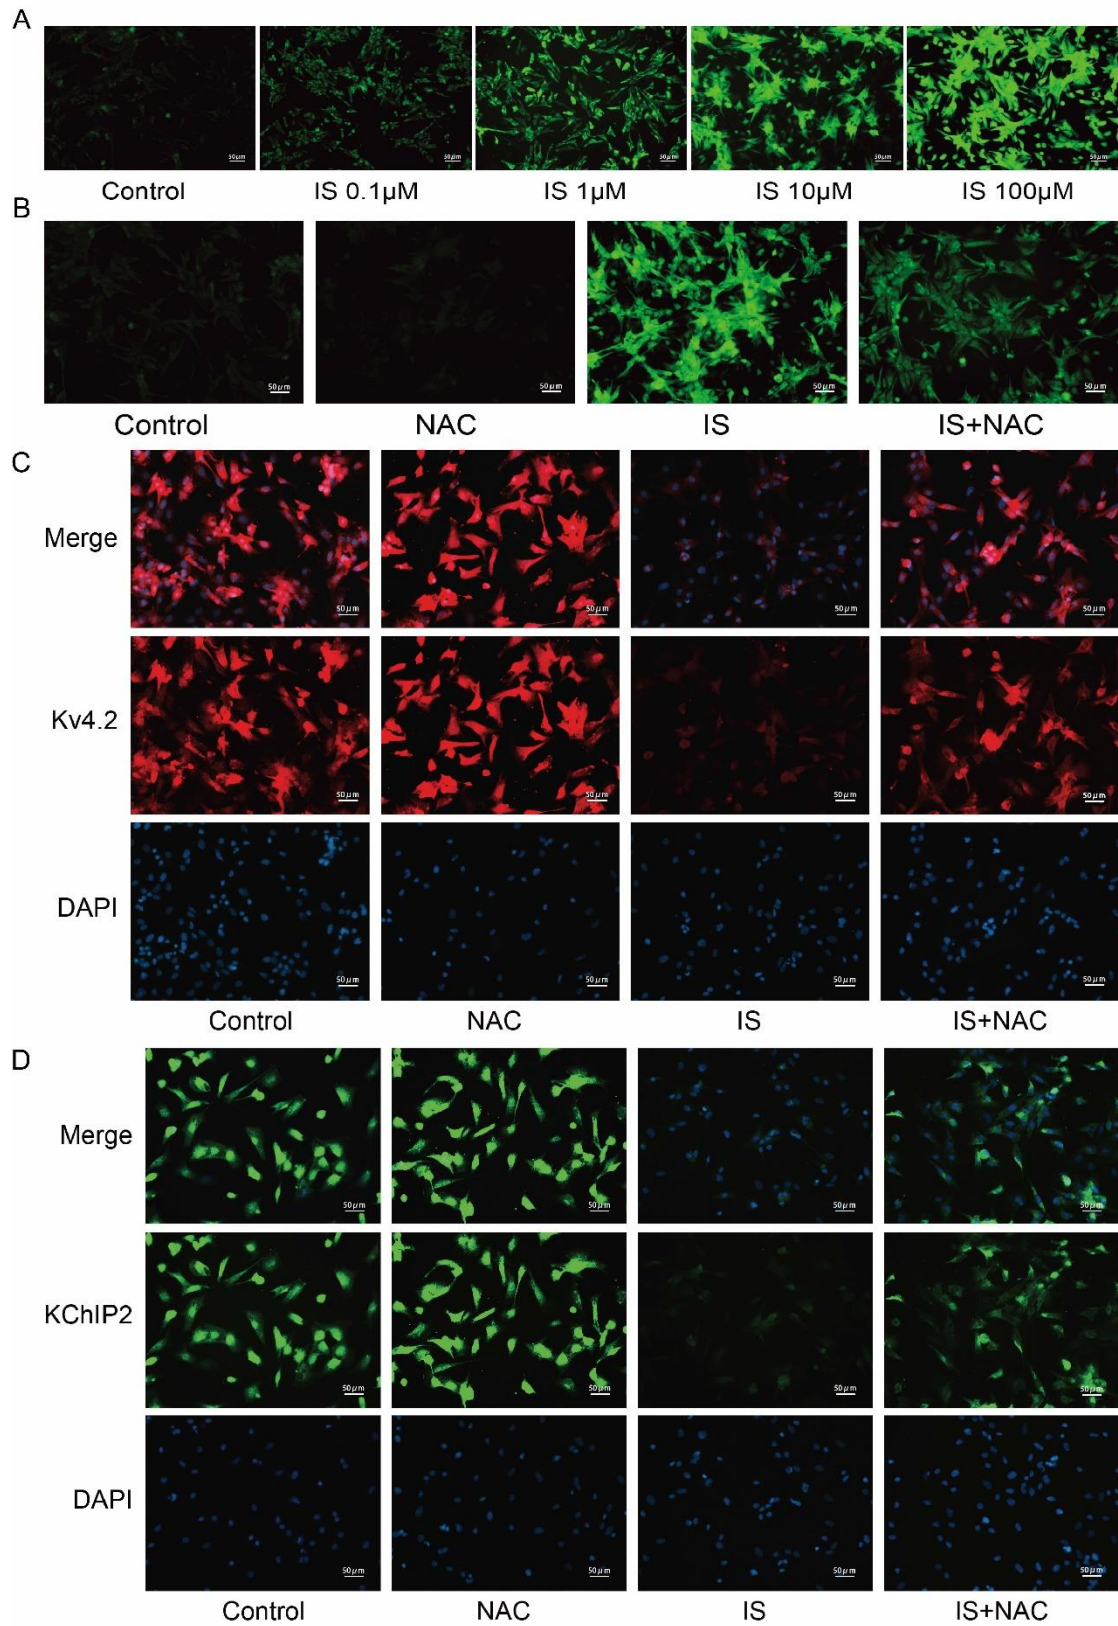

**Supplementary Figure 2. Measurements of ROS productions, Kv4.2 proteins and KCHIP2 proteins based on Immunofluorescence.** (A) Representative images of DCF immunofluorescence in NRVMs treated with different concentrations of IS. Scale bar, 50  $\mu$ m. (B) Representative images of DCF immunofluorescence in control, NAC, IS and IS+NAC groups. Scale

bar,50  $\mu\text{m}$ . (C) Representative fluorescence images of Kv4.2 proteins in control, NAC, IS and IS+NAC groups. Scale bar,50  $\mu\text{m}$ . (D) Representative fluorescence images of KChIP2 proteins in control, NAC, IS and IS+NAC groups. Scale bar,50  $\mu\text{m}$ . NAC, N-acetylcysteine.

### Supplementary Figure 3

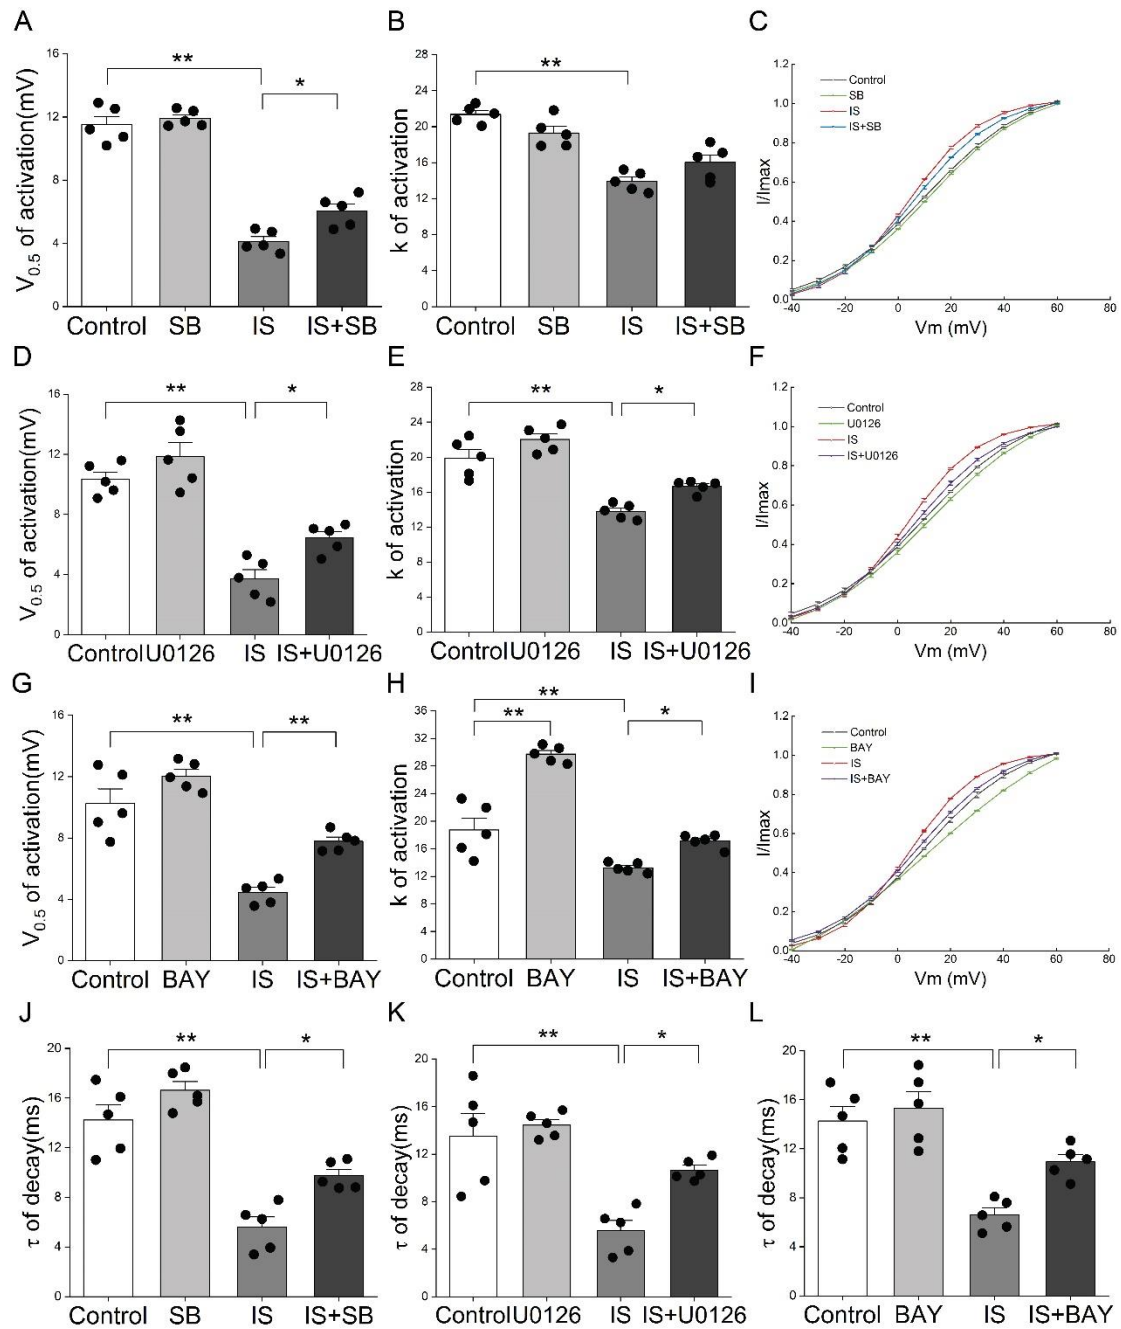

**Supplementary Figure 3. IS accelerated the activation and decay of  $I_{to,f}$  by activating p38 MAPK, p44/42 MAPK and NF- $\kappa$ B signaling pathway.** (A-B) Average values of half-maximal voltage of activation ( $V_{0.5}$ , act) (A) and constants (k) of activation (B) in control, SB, IS and IS+SB groups (n=5 per group). (C) Voltage-dependent activation curves of  $I_{to,f}$  in control, SB, IS and IS+SB groups (n=5 per group). (D-E) Average values of half-maximal voltage of activation ( $V_{0.5}$ , act) (D) and constants (k) of activation (E) in control, U0126, IS and IS+U0126 groups (n=5 per group). (F) Voltage-dependent activation curves of  $I_{to,f}$  in control, U0126, IS and IS+U0126 groups (n=5 per group). (G-H) Average values of half-maximal voltage of activation ( $V_{0.5}$ , act) (G) and constants (k) of activation (H) in control, BAY, IS and IS+BAY groups (n=5 per group). (I) Voltage-dependent activation curves of  $I_{to,f}$  in control, BAY, IS and IS+BAY groups. (J-L) Average time constants ( $\tau$ ) of decay of  $I_{to,f}$  at +60 mV in control, SB, IS and IS+SB groups (J), control, U0126, IS and IS+U0126 groups (K) and control, BAY, IS and IS+BAY groups (L) (n=5 per group). SB, SB203580; U0126, U0126-EtOH; BAY, BAY11-7082. Data are presented as mean  $\pm$  SEM. Statistical analysis was performed using one-way ANOVA followed by Bonferroni post-hoc test. \* $P < 0.05$ , \*\* $P < 0.01$ .
